# Supplementary material for: Epidemiological Study of Autoimmune Bullous Dermatoses in Northeastern Romania
Source: MDPI journal article supplement (doi:10.3390/diagnostics14010057), 2023-12-26
Supplement: s1 [file s1]

**Table S1.** Incidence rates of PV in different countries of the world.

| Country       | Region                                       | Time Period (y) | Annual Incidence Rate (/Million) |
|---------------|----------------------------------------------|-----------------|----------------------------------|
| Botswana [17] | Gaborone, Kanye, Mochudi, Lobatse, Mahalapye | 2008–2015       | 1.7 (0.9 [PF]; 0.8 [PV] )        |
| Bulgaria [18] | Sofia                                        | 1980–1995       | 4.7                              |
| Croatia [19]  | Zagreb                                       | 2005–2010       | 3.7                              |
| Finland[20]   | Nationwide                                   | 1969–1978       | 0.8                              |
| France [21]   | Midi-Pyrénées region                         | 2002–2006       | 2.7                              |
| Germany [22]  | lower Franconia                              | 2001–2002       | 0.5 (PV)                         |
| Greece[23]    | Thessaloniki                                 | 1985–2004       | 8.0 (PV)                         |
| India [24]    | Thrissur District                            | 2001            | 4.4                              |
| Israel [25]   | Jerusalem                                    | 1952–1972       | 16.1 (PV)                        |

|                      |                      |           |                                |         |
|----------------------|----------------------|-----------|--------------------------------|---------|
| Israel [26]          | Haifa                | 2000–2015 | 7.2                            |         |
| Iran [27]            | Tehran               | 1984–2003 | 16.0<br>District), 10.0 (Iran) | (Tehran |
| Italy [28]           | Sicily               | 1982–1996 | 6.0                            |         |
| North Macedonia [29] | Skopje               | 1990–2004 | 4.4                            |         |
| Poland [30]          | Podlaskie Province   | 2001–2015 | 3.7                            |         |
| Romania [14]         | Northwestern Romania | 2001–2007 | 4.0                            |         |
| Serbia [31]          | Vojvodina            | 1990–2002 | 6.6                            |         |
| Spain [32]           | Canary Islands       | 2004–2017 | 5.9                            |         |
| Switzerland [33]     | Nationwide           | 2001–2002 | 0.6                            |         |
| Taiwan [34]          | Nationwide           | 2002–2009 | 4.7                            |         |
| Taiwan [35]          | Nationwide           | 2010–2015 | 4.0                            |         |

|                     |                            |           |                                           |  |
|---------------------|----------------------------|-----------|-------------------------------------------|--|
| Tunisia [36]        | Northern Tunisia           | 1997–2007 | 8.6                                       |  |
| Turkey [37]         | All regions of the country | 2013–2014 | 4.7                                       |  |
| United Kingdom [38] | Nationwide                 | 1996–2006 | 6.8 (PV)                                  |  |
| United States [39]  | Connecticut                | 1972–1977 | 4.2 (general population), 32 (among Jews) |  |
